# Supplementary material for: Transcriptomic Profiling Reveals AKR1C1 and AKR1C3 Mediate Cisplatin Resistance in Signet Ring Cell Gastric Carcinoma via Autophagic Cell Death
Source: MDPI journal article supplement (doi:10.3390/ijms222212512), 2021-11-19
Supplement: s1 [file s1]

| Gene symbol | Forward Primer (5' → 3')        | Reverse Primer (5' → 3')        |
|-------------|---------------------------------|---------------------------------|
| AKR1C1      | GCCATATTGATTCTGCTCATTAT         | TGGGAATTGCTCCAAAGC              |
| AKR1C2      | AAGTAAAGCTCTAGAGGCCGT           | GCTCCTCATTATTGTAAACATGT         |
| AKR1C3      | TGGAAAACTCACTGAAAAAAGC          | CATTTTCATCTGTTGGTGAAAG          |
| AKR1B1      | GGATGAAGGGCTGGTGAA              | GTGGCACTCAATCTGGTTA             |
| AKR1B10     | CCCAAAGATGATAAAGGTAATGCCATCGGT  | CGATCTGGAAGTGGCTGAAATTGGAGA     |
| ALDOB       | CACCATTCAGGGCTTGATGGCCT         | TTCCTGGATAGCGAGGCTGGAT          |
| HSD12B2     | CAATGCTGCAGGACAGAGGA            | GTTACGGCCATGCATTGTT             |
| PLAC8       | GGAACAAGCGTCGCAATGAG            | AAAGTACGCATGGCTCTCCTT           |
| FGF21       | GACTGTGGGTTTCTGTGCTG            | GAATAACTCCCGGCTTCAAGG           |
| CPXM2       | GTGCGCGGGAAGAAATGAC             | CCTCCCTTGAGTGATGACACC           |
| TBC1D4      | AGATGGCCTGCCACGTT               | CTCTTTCATGGCCGCTTTAG            |
| FREM2       | TGAGCCAACTGTGTTTATTC            | GTATAACAGACCACCATCAAC           |
| ALDH1L2     | TAACACATACAACAAGACAGAT          | ATATTCATTTAGAGCTTCCTCA          |
| MDR1        | CCCATCATTGCAATAGCAGG            | GTTCAAACCTTCTGCTCCTGA           |
| MRP1        | CGG AAA CCA TCC ACG ACC CTA ATC | ACC TCC TCA TTC GCA TCC ACC TGG |
| XRCC1       | ACT GCT GGA ACC TGG CCC TGC     | GCA AAC CCC GAG GAG AAG GCA     |
| ERCC1       | AAG TGC TGC GAG CCC TGG GC      | AAT AAG GGC TTG GCC ACT CC      |
| GAPDH       | CCCCTTCATTGACCTCAACTAC          | GATGACAAGCTTCCCGTTCTC           |

Table S1. Primer sequences used in this study were listed.

| Top 50 upregulated genes | Log 2 Fold change | Top 50 upregulated genes | Log 2 Fold change |
|--------------------------|-------------------|--------------------------|-------------------|
| <i>ANKS1B</i>            | 10.00120701       | <i>DPEP1</i>             | 4.010343936       |
| <i>TMEM200B</i>          | 8.279903579       | <i>NCF1</i>              | 3.976568327       |
| <i>TMOD1</i>             | 7.411541132       | <i>TNNI2</i>             | 3.975859619       |
| <i>CXCL13</i>            | 6.582793746       | <i>CTD-3193O13.9</i>     | 3.925505776       |
| <i>CLDN22</i>            | 6.383369611       | <i>LPPR1</i>             | 3.862463534       |
| <i>SLC10A2</i>           | 6.221569778       | <i>AKR1C3</i>            | 3.707357856       |
| <i>ALDOB</i>             | 5.942942007       | <i>HPGD</i>              | 3.704429688       |
| <i>HSD17B2</i>           | 5.63596137        | <i>SRGAP3</i>            | 3.667642121       |
| <i>PLAC8</i>             | 5.5946095         | <i>GGTLC2</i>            | 3.654972786       |
| <i>CTD-307407.11</i>     | 5.579142468       | <i>CYP4F12</i>           | 3.639574743       |
| <i>AKR1C1</i>            | 5.565227132       | <i>PDZD3</i>             | 3.553896042       |
| <i>APOBEC1</i>           | 5.543903602       | <i>KRT20</i>             | 3.484469377       |
| <i>ENPP3</i>             | 5.381785846       | <i>GAGE12F</i>           | 3.474989902       |
| <i>AKR1C2</i>            | 5.295546827       | <i>GAGE12G</i>           | 3.471310628       |
| <i>ADAMTS18</i>          | 4.813060175       | <i>PADI2</i>             | 3.470230902       |
| <i>RP11-6N17.6</i>       | 4.74912944        | <i>CRYBB1</i>            | 3.468425963       |
| <i>DEFB1</i>             | 4.716958372       | <i>LGALS9C</i>           | 3.395554164       |
| <i>LGALS2</i>            | 4.546300171       | <i>APOD</i>              | 3.331868841       |
| <i>PHGR1</i>             | 4.412965345       | <i>ACSM3</i>             | 3.295612591       |
| <i>FAM3D</i>             | 4.393154683       | <i>CDH17</i>             | 3.280257658       |
| <i>REG4</i>              | 4.376451913       | <i>HTN1</i>              | 3.254720797       |
| <i>TM4SF5</i>            | 4.338300867       | <i>AKR1B15</i>           | 3.247006572       |
| <i>SPINK4</i>            | 4.20820479        | <i>LINC01088</i>         | 3.245920558       |
| <i>UGT1A5</i>            | 4.190219093       | <i>NMUR2</i>             | 3.240752369       |
| <i>PART1</i>             | 4.146625076       | <i>TGFBR3L</i>           | 3.187284262       |

Table S2. Top 50 upregulated differentially expressed genes (KATO/DDP vs KATOIII) analyzed by CLC genomic work bench.

| Top 50 down regulated genes | Log 2 Fold change | Top 50 down regulated genes | Log 2 Fold change |
|-----------------------------|-------------------|-----------------------------|-------------------|
| <i>DUX4L7</i>               | -10.08529421      | <i>TBC1D4</i>               | -5.471998485      |
| <i>MSANTD4</i>              | -9.938113925      | <i>ANKRD20A3</i>            | -5.420006916      |
| <i>GCOM1</i>                | -9.004911443      | <i>SLITRK1</i>              | -5.303238935      |
| <i>ZNF134</i>               | -8.908232759      | <i>ASB3</i>                 | -5.17177588       |
| <i>TUBA3C</i>               | -8.880048623      | <i>LUC7L2</i>               | -5.048251183      |
| <i>GAGE12C</i>              | -8.751851805      | <i>ALDH1L2</i>              | -4.990809922      |
| <i>TUBA3E</i>               | -8.72756069       | <i>CT45A5</i>               | -4.978625427      |
| <i>RP11-544M22.13</i>       | -7.961757733      | <i>PRSS1</i>                | -4.975307056      |
| <i>PCYT1B</i>               | -7.959000431      | <i>FAM157B</i>              | -4.965680434      |
| <i>ATP10A</i>               | -7.847628147      | <i>NECAB2</i>               | -4.931482747      |
| <i>GAGE12D</i>              | -7.638452541      | <i>GAGE2C</i>               | -4.918040046      |
| <i>OLFM2</i>                | -7.340402539      | <i>TGFB2</i>                | -4.917914633      |
| <i>TNFRSF9</i>              | -7.267109125      | <i>FREM2</i>                | -4.913189506      |
| <i>DUX4L13</i>              | -6.65803919       | <i>EYA4</i>                 | -4.90850198       |
| <i>FAM115B</i>              | -6.510186858      | <i>ZNF469</i>               | -4.884203884      |
| <i>PRSS3P2</i>              | -6.415960084      | <i>SSX1</i>                 | -4.829520825      |
| <i>LINC00326</i>            | -6.096395261      | <i>TBX20</i>                | -4.829215923      |
| <i>FGF21</i>                | -6.052656406      | <i>SOHLH2</i>               | -4.744286679      |
| <i>ST6GALNAC5</i>           | -6.031810226      | <i>SOX5</i>                 | -4.539827753      |
| <i>GDAP1L1</i>              | -5.829606389      | <i>PLAC9</i>                | -4.517630046      |
| <i>GGN</i>                  | -5.823501787      | <i>FAM200A</i>              | -4.465701387      |
| <i>CPXM2</i>                | -5.707164065      | <i>HCK</i>                  | -4.456694213      |
| <i>DUX4L4</i>               | -5.686992478      | <i>THSD7A</i>               | -4.455646016      |
| <i>POTEF</i>                | -5.666120276      | <i>POTED</i>                | -4.437075994      |
| <i>GAGE12J</i>              | -5.518564693      | <i>PDE4B</i>                | -4.436759955      |

Table S3. Top 50 downregulated differentially expressed genes (KATO/DDP vs KATOIII) analyzed by CLC genomic work bench.

| Gene ontology biological process term     | Genes Names                                                                                                                                                         |
|-------------------------------------------|---------------------------------------------------------------------------------------------------------------------------------------------------------------------|
| Oxidation reduction process               | <i>STEAP2, ALDH1L2, AKR1B10, AKR1B15, AKR1C1, AKR1C2, AKR1C3, CBR3, CYP1A1, Cyp26B1, CYP4F12, CYP4F3, FAR2P1, HPGD, HSD17B2, IDP1, LPO, LOXL4, NCF1, PDPR, SOD3</i> |
| Digestion                                 | <i>UGT1A1, ADM2, AKR1B10, AKR1C1, AKR1C2, PRSS1, PRSS3P2, TFF2, TFF3</i>                                                                                            |
| Positive regulation of gene expression    | <i>PRDM1, SMAD1, WNT11, ADM2, ANK2, CAV1, CYP26B1, HMG5, RPS6KA2, SLC26A9, TGFB2, VEGFA</i>                                                                         |
| Angiogenesis                              | <i>ADM2, APOD, CAV1, NRXN1, RAMP1, SLC12A6, THSD7A, TGFB2, TNFSF12, UNC5B, VEGFA</i>                                                                                |
| Negative regulation of cell proliferation | <i>CD33, ETS1, FOSL1, KLF10, SMAD1, TNFRSF9, CDKN2B, IFITM1, RARRES3, RPS6KA2, SSTR5, TES, TGFB2</i>                                                                |
| Steroid metabolic process                 | <i>UGT1A1, AKR1B10, AKR1C2, AKR1C3, CYP1A1, SULT1E1</i>                                                                                                             |
| Regulation of apoptosis process           | <i>BCL2L14, ETS1, IKZF3, TNFRSF9, CASP1, CARD16, DAPK1, INHPC, INHBE, SDF2L1</i>                                                                                    |
| Daunorubicin metabolic process            | <i>AKR1B10, AKR1C1, AKR1C2, AKR1C3</i>                                                                                                                              |
| Doxorubicin metabolic process             | <i>AKR1B10, AKR1C1, AKR1C2, AKR1C3</i>                                                                                                                              |
| Response to hypoxia                       | <i>DTIT4, ETS1, CA9, CASP1, CAV1, CYP1A1, SOD3, TGFB2, VEGFA</i>                                                                                                    |

Table S4. Genes involved in top ten gene ontology biological process by David gene function annotation.

| GO term                          | Upregulated genes (KATO/DDP vs KATOIII)                                                                                                                                                                                                                                                                                                                                                                | Downregulated genes (KATO/DDP vs KATOIII)                                                                                                                                                                                                       |
|----------------------------------|--------------------------------------------------------------------------------------------------------------------------------------------------------------------------------------------------------------------------------------------------------------------------------------------------------------------------------------------------------------------------------------------------------|-------------------------------------------------------------------------------------------------------------------------------------------------------------------------------------------------------------------------------------------------|
| Oxidation reduction Process      | <i>ALDOB</i> , <b><i>AKRIC1</i></b> , <i>HSD17B2</i> , <b><i>AKRIC2</i></b> , <i>NCF1</i> , <i>CYP4F12</i> , <b><i>AKRIC3</i></b> , <i>HPGD</i> , <i>APOD</i> , <b><i>AKRIB15</i></b> , <i>CYP4F3</i> , <i>IDO1</i> , <b><i>AKRIB10</i></b> , <i>CBR3</i>                                                                                                                                              | <i>SESN2</i> , <i>SOD3</i> , <i>MT-ND4L</i> , <i>LOXL4</i> , <i>STEAP2</i> , <i>PDPR</i> , <i>CYP1A1</i> , <i>CYP26B1</i> , <i>LPO</i> , <i>ALDH1L2</i>                                                                                         |
| Small molecule metabolic process | <i>ALDOB</i> , <b><i>AKRIC1</i></b> , <i>APOBEC1</i> , <i>ENPP3</i> , <b><i>AKRIC2</i></b> , <i>UGT1A5</i> , <i>DPEPI</i> , <i>CYP4F12</i> , <b><i>AKRIC3</i></b> , <i>HPGD</i> , <i>ADOP</i> , <i>ACSM3</i> , <i>TCN1</i> , <i>CYP4F3</i> , <i>IDO1</i> , <b><i>AKRIB10</i></b> , <i>CBR3</i> , <i>QPRT</i> , <i>UGT1A1</i> , <i>TFF3</i> , <i>UGT1A10</i> , <i>BAAT</i> , <i>PSMB10</i> , <i>DBI</i> | <i>SESN2</i> , <i>ABCA1</i> , <i>PDPR</i> , <i>CAV1</i> , <i>CYP1A1</i> , <i>GSTM2</i> , <i>OGT</i> , <i>CYP26B1</i> , <i>CTH</i> , <i>RIMKLB</i> , <i>SULT1E1</i> , <i>ST6GAL1</i> , <i>LPO</i> , <i>PDE4B</i> , <i>PRSS1</i> , <i>ALDH1L2</i> |
| Cofactor metabolic process       | <i>ALDOB</i> , <b><i>AKRIC1</i></b> , <b><i>AKRIC2</i></b> , <i>DPEPI</i> , <i>GGTLC2</i> , <b><i>AKRIC3</i></b> , <i>ACSM3</i> , <i>TCN1</i> , <i>IDO1</i> , <b><i>AKRIB10</i></b> , <i>CBR3</i> , <i>QPRT</i> , <i>UGT1A1</i> , <i>BAAT</i> , <i>DBI</i>                                                                                                                                             | <i>PDPR</i> , <i>CYP1A1</i> , <i>GSTM2</i> , <i>CHAC1</i> , <i>LPO</i> , <i>PRSS1</i> , <i>ALDH1L2</i>                                                                                                                                          |

Table S5. Genes involved in top GO terms by gene set enrichment analysis
